# Supplementary material for: Contribution of collagen-binding protein Cnm of Streptococcus mutans to induced IgA nephropathy-like nephritis in rats
Source: PubMed Central journal article supplement — Commun Biol. 2024 Sep 14;7:1141. doi: 10.1038/s42003-024-06826-x (PMC11401903; doi:10.1038/s42003-024-06826-x), 2024-09-14
Supplement: 42003_2024_6826_MOESM2_ESM.pdf [file 42003_2024_6826_MOESM2_ESM.pdf]

Supplementary Table 1. Serum level of IgA and IgG in rats with PBS, SN74 and rCnm protein groups.

| Groups     | Serum levels (mean $\pm$ SEM) |                    |
|------------|-------------------------------|--------------------|
|            | IgA (mg/dL)                   | IgG (mg/dL)        |
| PBS (n=8)  | 262.41 $\pm$ 4.97             | 386.40 $\pm$ 13.07 |
| SN74 (n=8) | 255.29 $\pm$ 2.65             | 393.03 $\pm$ 9.77  |
| rCnm (n=8) | 259.65 $\pm$ 3.96             | 423.15 $\pm$ 7.00* |

Statistical significance was determined by analysis of variance with Bonferroni's correction. There were no significant differences in levels between the groups. SEM, standard error of the mean. \*PBS vs rCnm.  $P < 0.0167$ .

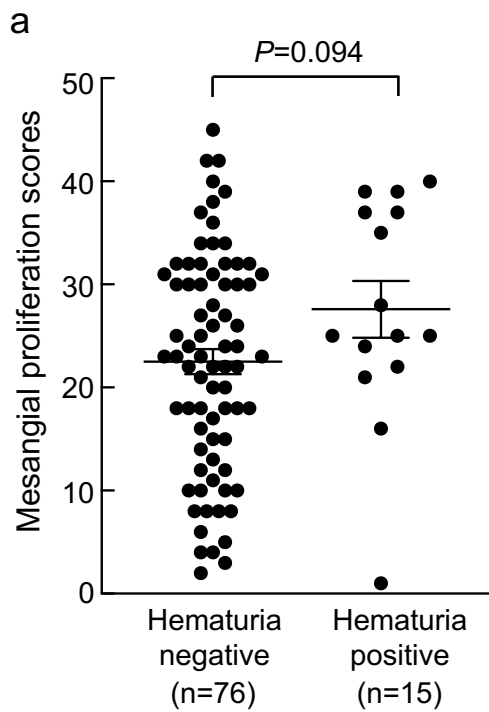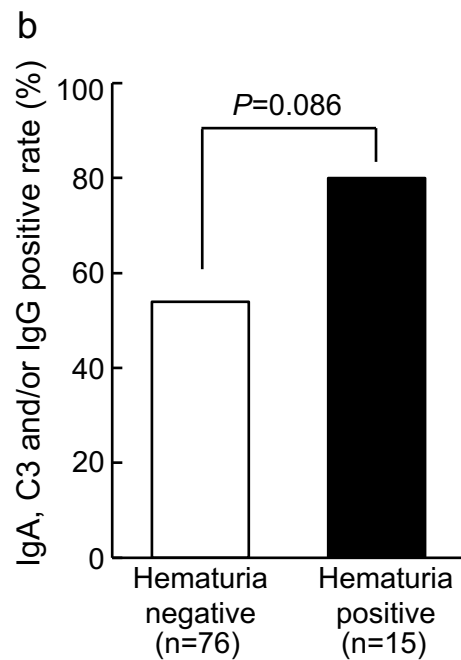

Supplementary Fig 1. Relationship between hematuria and pathogenicity. (a) Relationship between hematuria and mesangial proliferation score, (b) Relationship between hematuria and IgA, C3 and/or IgG positive rate, Each column represents the mean  $\pm$  standard errors of the means of the hematuria negative group (n=76), hematuria positive group (n=15), (a) Statistical significance was determined by analysis of variance with Student-*t* test. (b) Statistical significance was determined using Fisher's exact test.

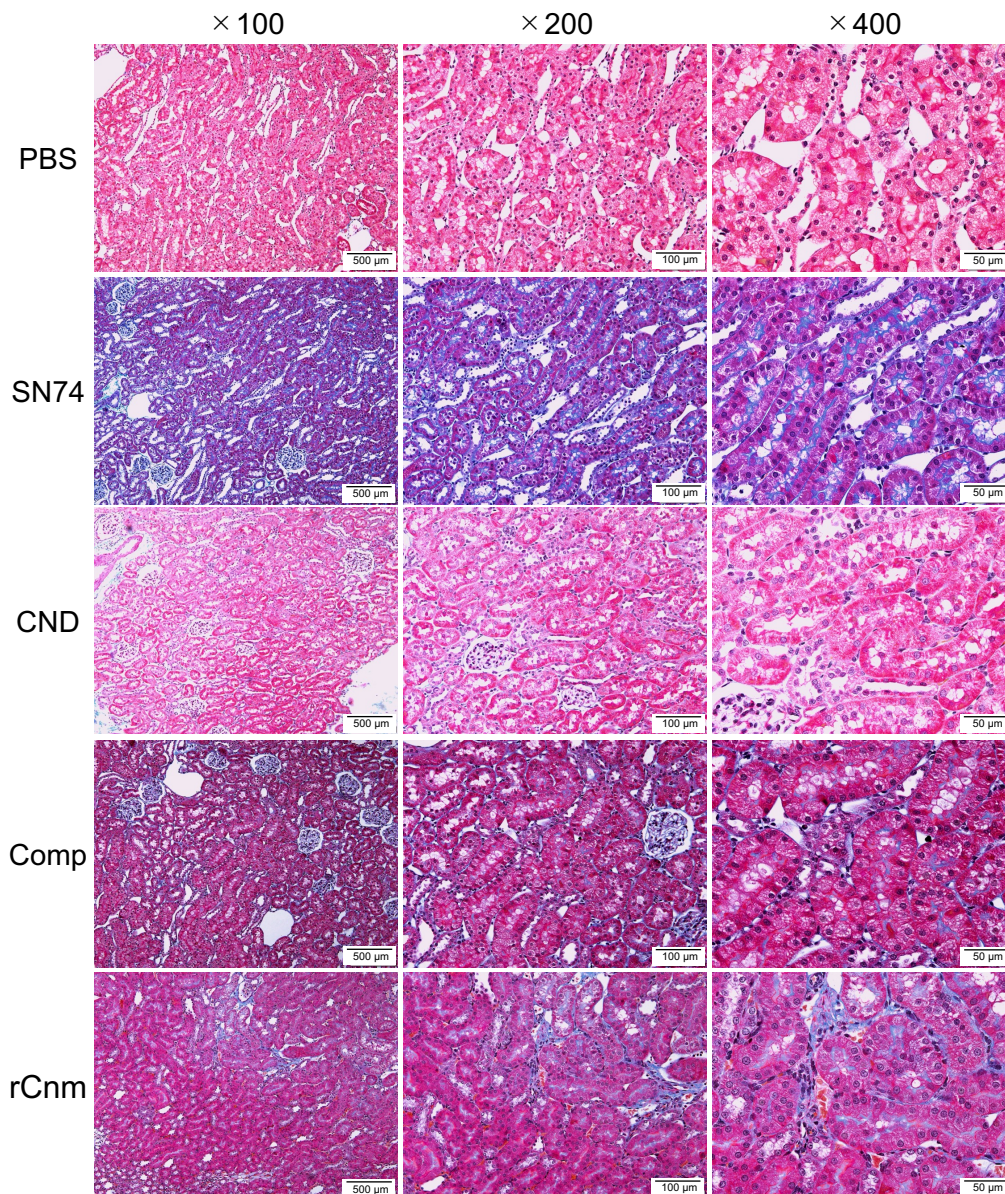

**Supplementary Fig 2. Representative histopathological appearance of the tubules and interstitial area by immunohistochemistry with Masson's trichrome staining.** The magnification of the first images is × 100. The magnification of the second images is × 200. The magnification of the third images is × 400. Scale bars, 500 μm (left panels), 100 μm (middle panels) and 50 μm (right panels).



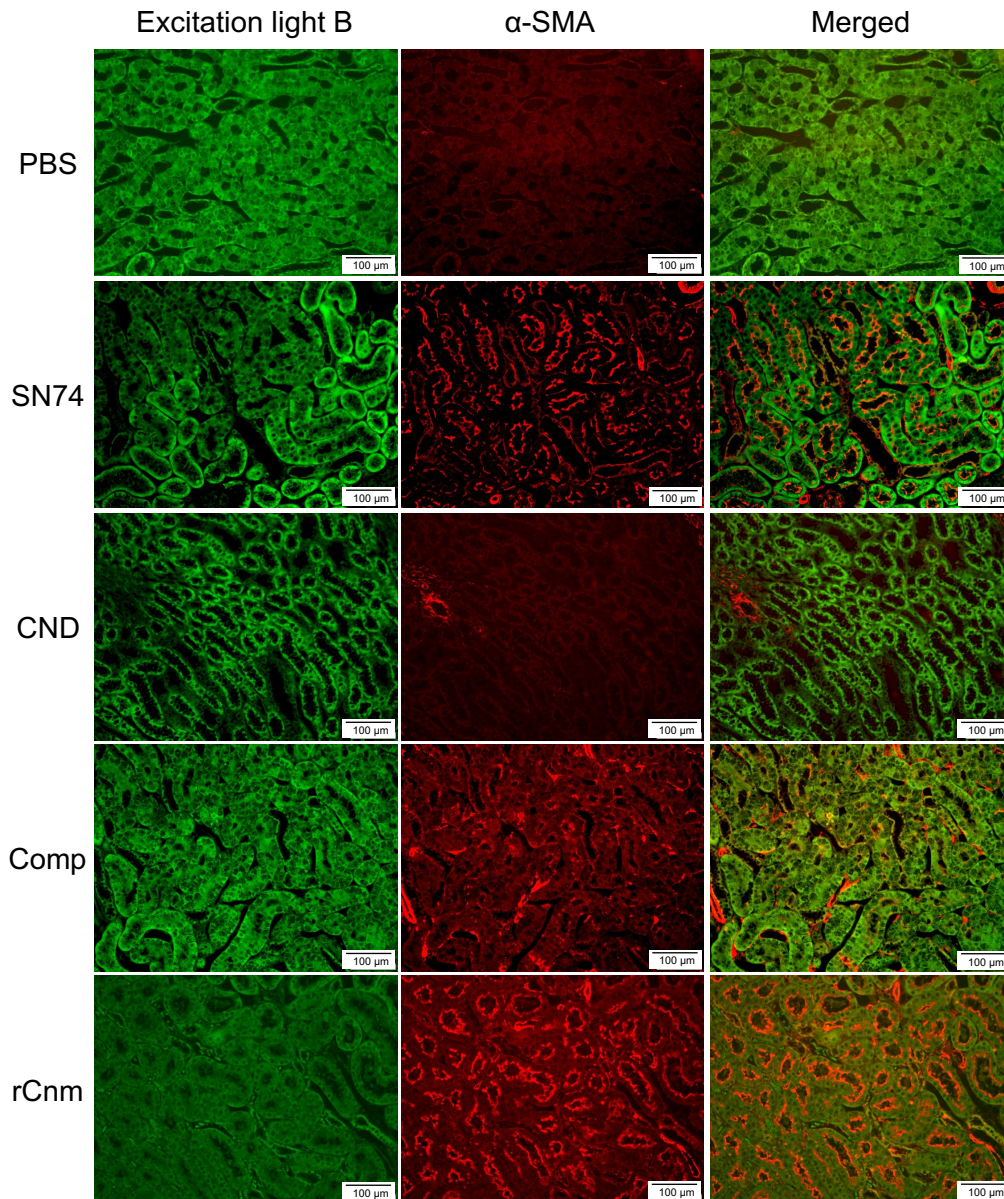

**Supplementary Fig 3. Representative histopathological appearance of the tubules and interstitial area by immunohistochemistry with  $\alpha$ -SMA-specific antibodies.** The first image was taken by applying excitation light Blue. The second image shows staining with an anti- $\alpha$ -SMA antibody. The third row of images show the left two images superimposed. Scale bars, 100  $\mu$ m (all panels).
