# Supplementary material for: Contribution of collagen-binding protein Cnm of Streptococcus mutans to induced IgA nephropathy-like nephritis in rats
Source: PubMed Central journal article supplement — Commun Biol. 2024 Sep 14;7:1141. doi: 10.1038/s42003-024-06826-x (PMC11401903; doi:10.1038/s42003-024-06826-x), 2024-09-14
Supplement: 42003_2024_6826_MOESM3_ESM.pdf [file 42003_2024_6826_MOESM3_ESM.pdf]

**Description Of Additional Supplementary File.**

**File name:** Supplementary data 1

**Description:** Source data for figures.
